# Supplementary material for: Label-free dual assay of DNA sequences and potassium ions using an aptamer probe and a molecular light switch complex
Source: Royal Society of Chemistry journal article supplement (doi:10.1039/b915994k), 2009-01-01
Supplement: b915994k.pdf [file b915994k.pdf]

## Supporting Information

### Label-free Dual Assay of DNA Sequences and Potassium Ions Using an Aptamer Probe and a Molecular Light Switch Complex

Min Sun Choi, Minji Yoon, [Jin-Ook Baeg](#), Jinheung Kim \*

[\*] M. S. Choi, M. Yoon, Prof. Dr. J. Kim  
Department of Chemistry and Nano Science  
Ewha Womans University  
Seoul 120-750, Korea  
Fax: (+82) 2-3277-3419  
E-mail: [jinheung@ewha.ac.kr](mailto:jinheung@ewha.ac.kr)

[Dr. J.-O. Baeg](#)  
[Advanced Chemical Technology Division](#)  
[Korea Research Institute of Chemical Technology \(KRICT\)](#)  
[100 Jang-dong, Yuseong-gu, Daejeon 305-343](#)

[\*\*] This research was supported by the Korea Research Foundation Grant (Basic Research Promotion Fund, KRF-2008-313-C00437 to JK), National Research Foundation of Korea Grant funded by the Korean Government (20090063005 to JK), KRICT 2020 Project (2009), and BK21 (to MSC, MY).

## Experimental Section

**Materials and Instrumentation.** Water was purified with a MilliQ purification system. *rac*-Ru(phen)<sub>2</sub>(dppz)<sup>2+</sup> (**1**) was prepared as described elsewhere[1]. All oligonucleotides were purchased from Jenotec Inc. (Deajeon, Korea) and were purified by HPLC using a Thermo hypersyl gold column (0.46 x 25 cm). Other chemicals were purchased from Aldrich. Oligonucleotide concentrations were determined spectrophotometrically monitoring the absorbance at 260 nm,  $\epsilon = 6600 \text{ M}^{-1} \text{ cm}^{-1}$  on a Hewlett-Packard 8452A diode-array spectrometer. Once single-stranded DNA concentrations were known, equal molar amounts of target DNA were mixed, annealed at 90 °C for 10 min, and then allowed to slowly cool to room temperature to prepare the double-stranded DNA. The G-quadruplex form of **P** was prepared with 0.4  $\mu\text{M}$  **P** in the presence of 1.6 mM K<sup>+</sup>. The mixed solution of **P** and K<sup>+</sup> was warmed to 70 °C for 30 min and cooled down to form the G-quadruplex form.

Optical rotations were determined at ambient temperature using a JASCO J-810 polarimeter. Emission spectra were collected on a Perkin-Elmer LS 55 luminescence spectrophotometer and the temperature held constant by a water thermostat.

**DNA sequence analysis and mismatch detection.** In a typical experiment, a sample containing the G-quadruplex form of 0.4  $\mu\text{M}$  **P** and 1.6 mM potassium ions dissolved in buffered aqueous solution containing 5 mM Tris-HCl buffer (pH = 7.4) was mixed with 0.4  $\mu\text{M}$  matched or mismatched oligonucleotides (**T1-T5**) for 5 min at room temperature. Then, Ru(phen)<sub>2</sub>(dppz)<sup>2+</sup> (4  $\mu\text{M}$ ) was added and then emission spectra were taken after 1 min. Each target was suspended in the buffer so that the composition of the buffer did not change in the final solution.

**Time-dependent fluorescence measurement.** The vials containing the G-quadruplex form of 0.4  $\mu\text{M}$  **P** was prepared in 5 mM Tris-HCl buffer (pH = 7.4) at 4 °C. **T1** (0.4  $\mu\text{M}$ ) was treated to all vials at the same time, and then Ru(phen)<sub>2</sub>(dppz)<sup>2+</sup> (4  $\mu\text{M}$ ) was mixed 1 min

before the fluorescence emission measurement of the solution in each vial at a specific time. The data points were obtained from the average of three independent measurements.

**Detection of potassium ions.** The solution of **P/T1** (0.4  $\mu\text{M}$ ) mixed with a certain amount of potassium or other metal ions was heated to 70  $^{\circ}\text{C}$  for 30 min and cooled down quickly by placing it in [a ice bath](#). Then, the emission fluorescence of **1** was taken right after the solution was warmed to room temperature. The data points were obtained from the average of three independent measurements.

## References

- [1] (a) A. E. Friedman, J.-C. Chambron, J. P. Sauvage, N. J. Turro, J. K. Barton, *J. Am. Chem. Soc.* **1990**, *112*, 4960. (b) Y. Jenkins, A. E. Friedman, N. J. Turro, J. K. Barton, *Biochemistry*, **1992**, *31*, 10809.

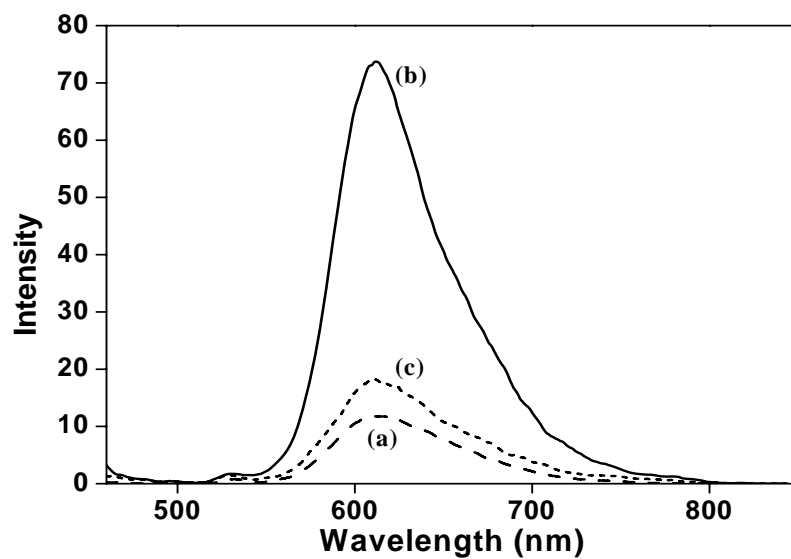

**Figure S1.** Comparison of fluorescence emission observed for 4 μM solution of **1** in the presence of (a) 0.4 μM **P**, (b) the double-stranded **P/T1**, and (c) the quadruplex generated with **P** and 1.6 mM K<sup>+</sup>. Solution: 5 mM Tris-HCl (pH 7.4); excitation wavelength: 450 nm. The fluorescence intensities are plotted in arbitrary units (au).

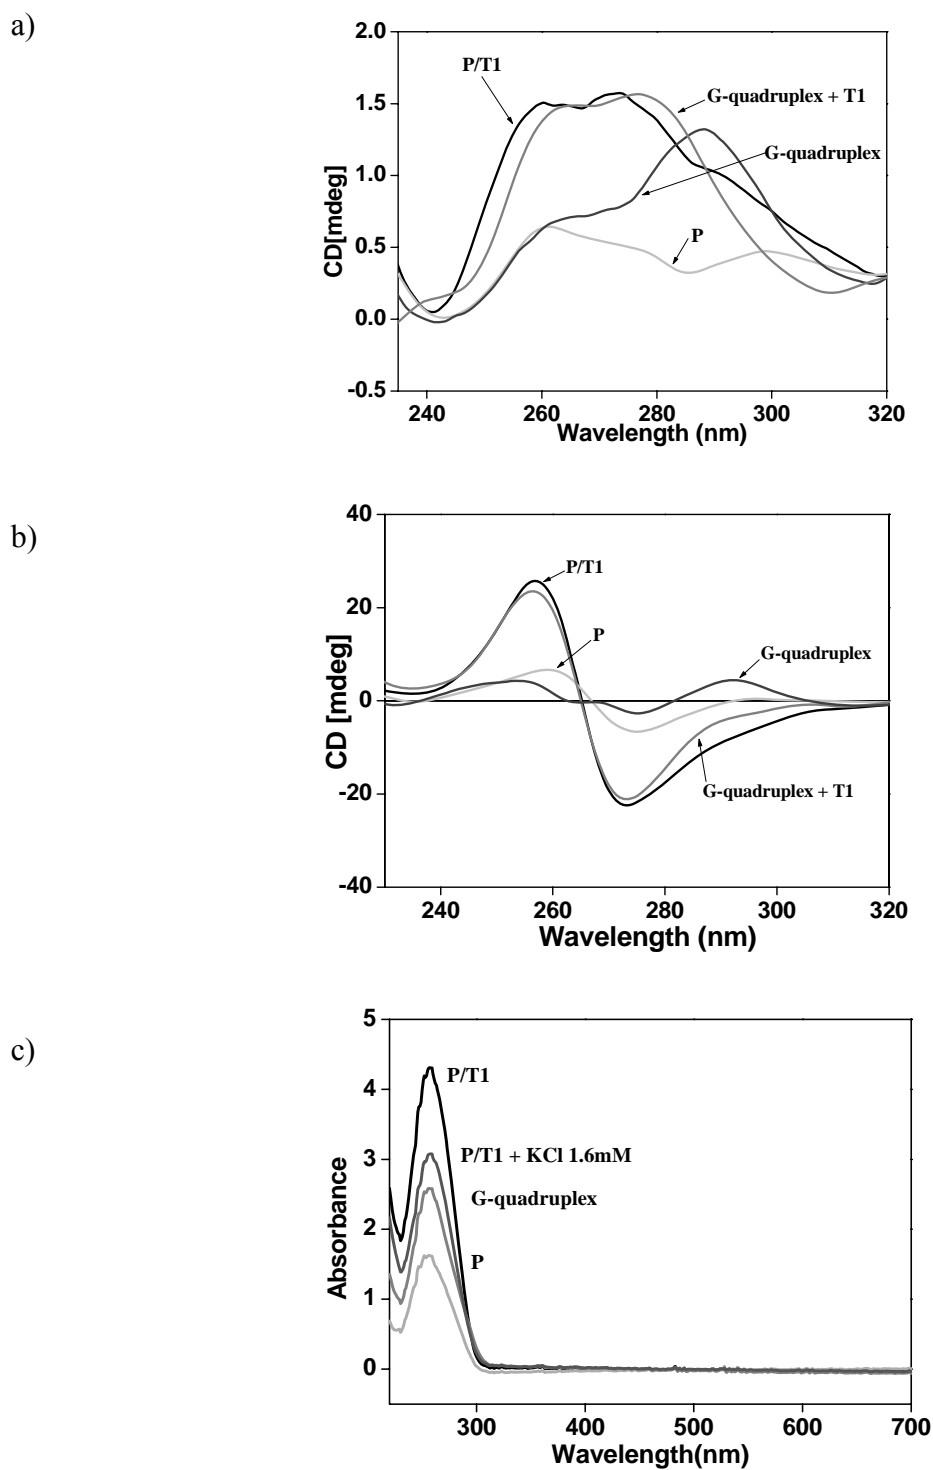

**Figure S2.** (a)(b) CD spectra and (c) UV-vis spectra of the solutions of **P** ( $0.4 \mu\text{M}$ ), **P/T1**, the G-quadruplex of **P** formed in the presence of  $1.6 \text{ mM K}^+$ , and the G-quadruplex form treated with **T1** at room temperature in  $5 \text{ mM Tris-HCl}$  buffer at pH 7.4. In the case of (b), all four samples were measured in the presence of **1**.

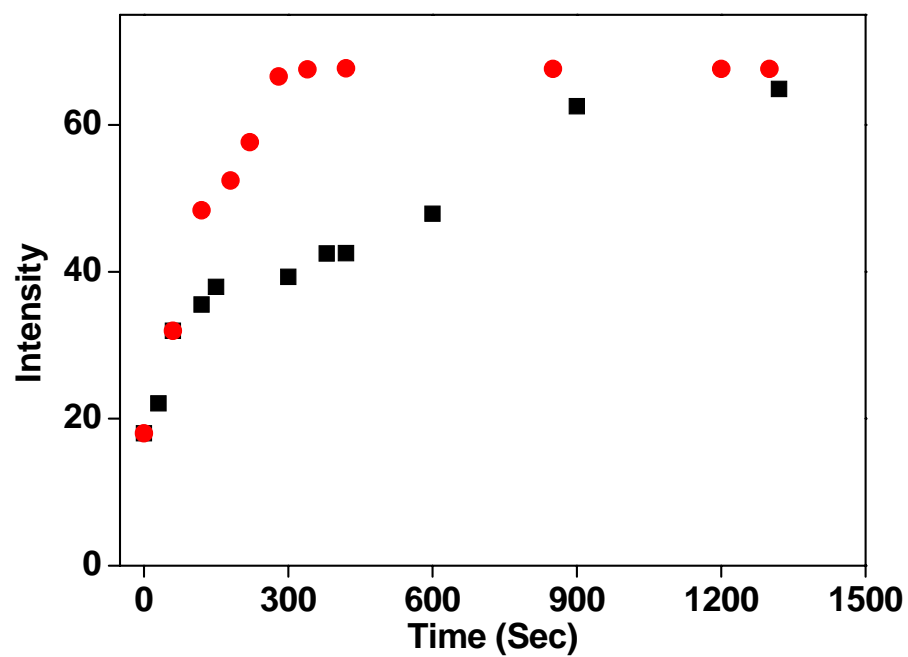

**Figure S3.** Time-dependent change of fluorescence intensities of the solutions after adding **T1** to **P** (each  $0.4 \mu\text{M}$ , ●) and the G-quadruplex structure of **P** (prepared with  $1.6 \text{ mM K}^+$ , ■) at  $610 \text{ nm}$  at  $4 \text{ }^\circ\text{C}$ .

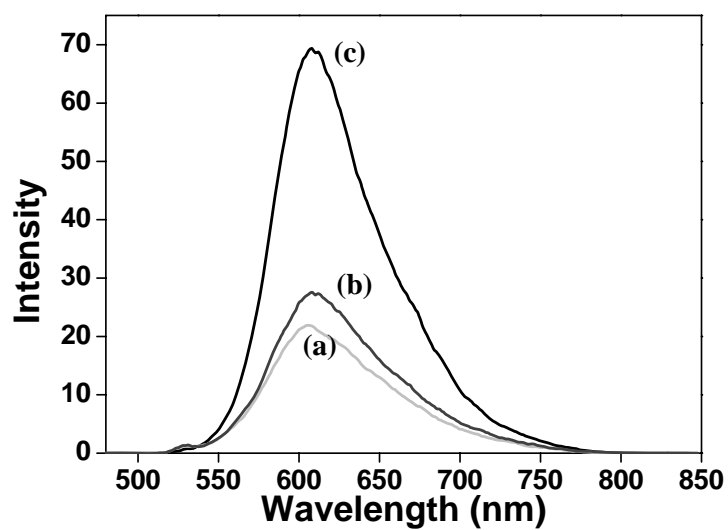

**Figure S4.** Fluorescence emission spectra of 4  $\mu\text{M}$  **1** in the solutions containing (a) the G-quadruplex form of **P** (0.4  $\mu\text{M}$ ) prepared with 1.6 mM  $\text{K}^+$ , (b) the G-quadruplex form treated with **T2** (0.4  $\mu\text{M}$ ) for 5 min at room temperature, and (c) the G-quadruplex form treated with **T2** (0.4  $\mu\text{M}$ ) for 5 min and then **T1** (0.4  $\mu\text{M}$ ) for 10 min.

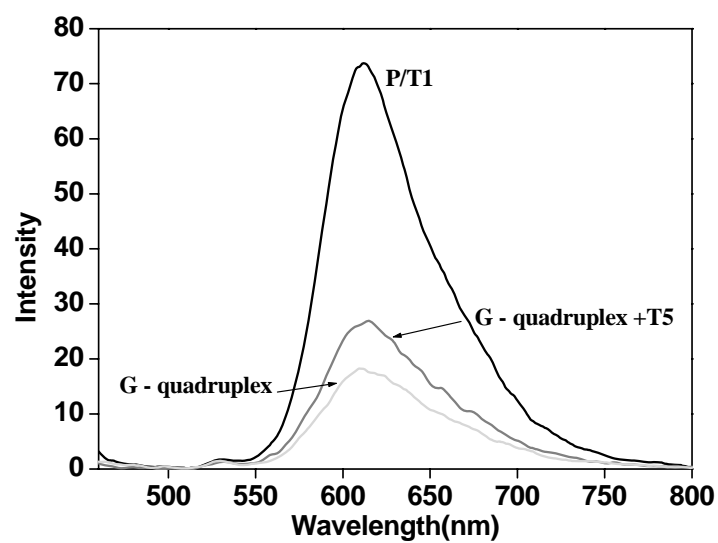

**Figure S5.** Fluorescence emission spectra of the solutions containing the double-stranded **P/T1** (0.4  $\mu\text{M}$ ), the G-quadruplex form of **P** (0.4  $\mu\text{M}$ ), and the G-quadruplex form of **P** treated with **T5** (0.4  $\mu\text{M}$ ).



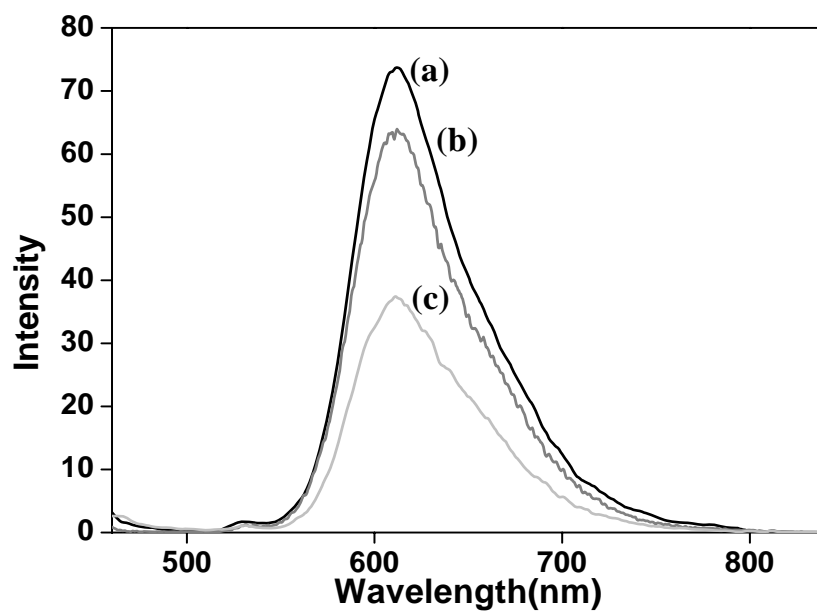

**Figure S6.** Fluorescence spectra acquired using  $\lambda_{\text{ex}} = 450 \text{ nm}$ : (a)  $0.4 \mu\text{M P/T1}$ , (b) **P/T1** mixed with  $1.6 \text{ mM K}^+$  at room temperature, and (c) **P/T1** treated by heating and fast cooling in the presence of  $1.6 \text{ mM K}^+$ .

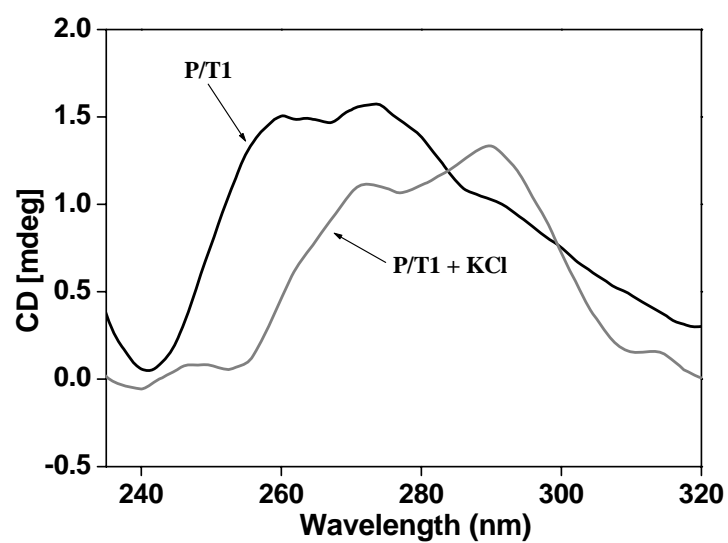

**Figure S7.** CD spectra of **P/T1** (0.4  $\mu\text{M}$ ), and **P/T1** and 1.6 mM  $\text{K}^+$  prepared by the treatment of heating and fast-cooling in 5 mM Tris-HCl buffer at pH 7.4.

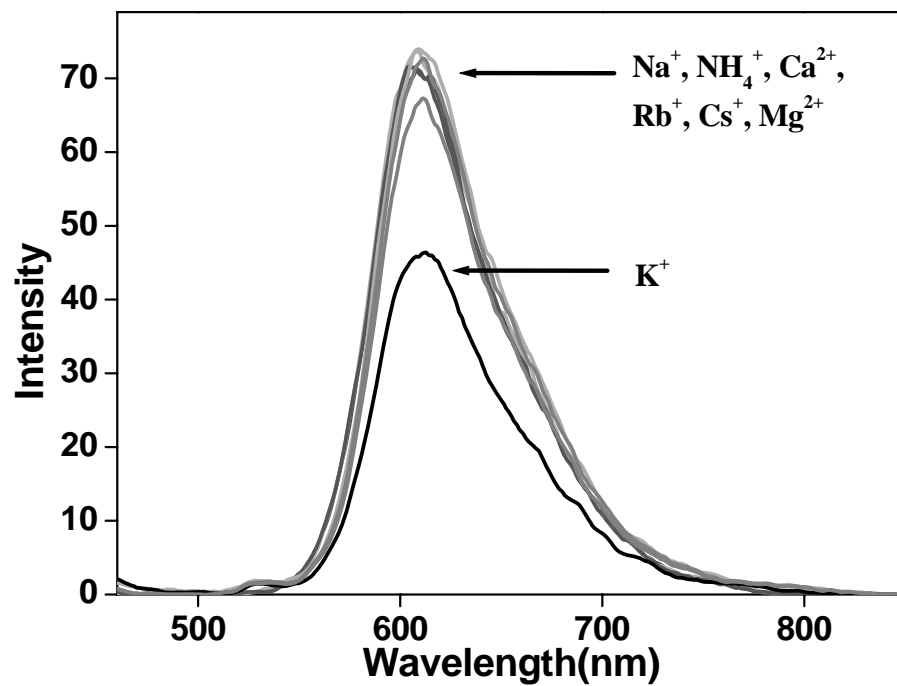

**Figure S8.** Fluorescence spectra of the solutions of 0.4 μM P/T1 duplex after the treatment of heating and fast-cooling in the presence of selected cations (0.48 mM), in 5 mM Tris-HCl buffer, pH 7.4, excitation at 450 nm.

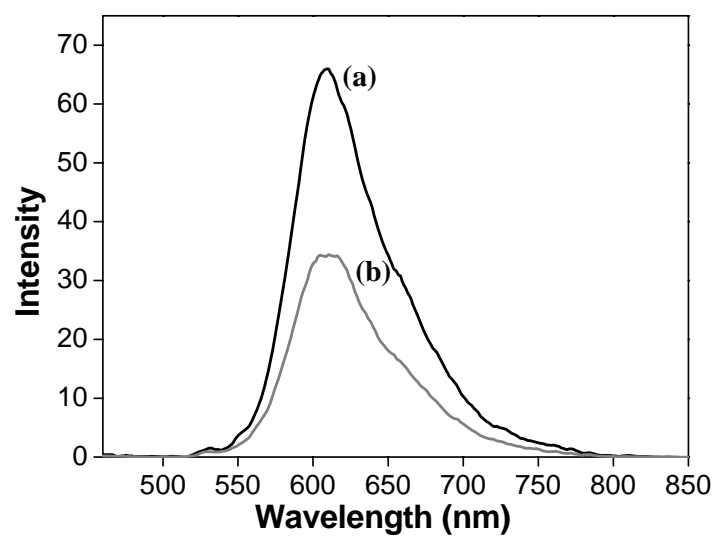

**Figure S9.** Fluorescence spectra of the solutions of 0.4  $\mu\text{M}$  **P/T1** duplex after the treatment of heating and fast-cooling in the presence of (a) 50 mM  $\text{Na}^+$  and (b) 1.6 mM  $\text{K}^+$  and 50 mM  $\text{Na}^+$ , in 5 mM Tris-HCl buffer, pH 7.4, excitation at 450 nm.
